# Supplementary material for: Which procedures are performed by general internists practicing primary care in Germany? - a cross-sectional study
Source: PubMed Central journal article supplement (PMC7191754; doi:10.1186/s12875-020-01136-7), 2020-04-29
Supplement: 12875_2020_1136_MOESM1_ESM.pdf [file 12875_2020_1136_MOESM1_ESM.pdf]

# Procedures in Primary Care

If not indicated otherwise, please choose one single answer. We define procedures in the following as self-contained, diagnostic or therapeutic activities performed on patients, which require knowledge and manual skills.

Please tick **two boxes per line** in the following part of the questionnaire.

| Procedures                                                   | How important do you think it is to learn this procedure during residency? |                          |                          |                          | Do you perform this procedure in your own practice? |                          |
|--------------------------------------------------------------|----------------------------------------------------------------------------|--------------------------|--------------------------|--------------------------|-----------------------------------------------------|--------------------------|
|                                                              | very important                                                             | important                | less important           | not important            | yes                                                 | no                       |
| <b>Integument</b>                                            |                                                                            |                          |                          |                          |                                                     |                          |
| 1. Incise and drain abscess                                  | <input type="checkbox"/>                                                   | <input type="checkbox"/> | <input type="checkbox"/> | <input type="checkbox"/> | <input type="checkbox"/>                            | <input type="checkbox"/> |
| 2. Wound debridement                                         | <input type="checkbox"/>                                                   | <input type="checkbox"/> | <input type="checkbox"/> | <input type="checkbox"/> | <input type="checkbox"/>                            | <input type="checkbox"/> |
| 3. Suture of skin lacerations                                | <input type="checkbox"/>                                                   | <input type="checkbox"/> | <input type="checkbox"/> | <input type="checkbox"/> | <input type="checkbox"/>                            | <input type="checkbox"/> |
| 4. Gluing of laceration                                      | <input type="checkbox"/>                                                   | <input type="checkbox"/> | <input type="checkbox"/> | <input type="checkbox"/> | <input type="checkbox"/>                            | <input type="checkbox"/> |
| 5. Perform punch biopsy of skin lesion                       | <input type="checkbox"/>                                                   | <input type="checkbox"/> | <input type="checkbox"/> | <input type="checkbox"/> | <input type="checkbox"/>                            | <input type="checkbox"/> |
| 6. Perform excisional skin biopsy                            | <input type="checkbox"/>                                                   | <input type="checkbox"/> | <input type="checkbox"/> | <input type="checkbox"/> | <input type="checkbox"/>                            | <input type="checkbox"/> |
| 7. Excision of lipoma                                        | <input type="checkbox"/>                                                   | <input type="checkbox"/> | <input type="checkbox"/> | <input type="checkbox"/> | <input type="checkbox"/>                            | <input type="checkbox"/> |
| 8. Perform cryotherapy of skin lesions                       | <input type="checkbox"/>                                                   | <input type="checkbox"/> | <input type="checkbox"/> | <input type="checkbox"/> | <input type="checkbox"/>                            | <input type="checkbox"/> |
| 9. Perform electrocautery of skin lesions                    | <input type="checkbox"/>                                                   | <input type="checkbox"/> | <input type="checkbox"/> | <input type="checkbox"/> | <input type="checkbox"/>                            | <input type="checkbox"/> |
| 10. Scrape skin for fungus determination                     | <input type="checkbox"/>                                                   | <input type="checkbox"/> | <input type="checkbox"/> | <input type="checkbox"/> | <input type="checkbox"/>                            | <input type="checkbox"/> |
| 11. Use Wood lamp                                            | <input type="checkbox"/>                                                   | <input type="checkbox"/> | <input type="checkbox"/> | <input type="checkbox"/> | <input type="checkbox"/>                            | <input type="checkbox"/> |
| 12. Release subungual hematoma                               | <input type="checkbox"/>                                                   | <input type="checkbox"/> | <input type="checkbox"/> | <input type="checkbox"/> | <input type="checkbox"/>                            | <input type="checkbox"/> |
| 13. Drain acute paronychia                                   | <input type="checkbox"/>                                                   | <input type="checkbox"/> | <input type="checkbox"/> | <input type="checkbox"/> | <input type="checkbox"/>                            | <input type="checkbox"/> |
| 14. Partially remove toenail                                 | <input type="checkbox"/>                                                   | <input type="checkbox"/> | <input type="checkbox"/> | <input type="checkbox"/> | <input type="checkbox"/>                            | <input type="checkbox"/> |
| 15. Remove foreign body (e.g. fish-hook, splinter, or glass) | <input type="checkbox"/>                                                   | <input type="checkbox"/> | <input type="checkbox"/> | <input type="checkbox"/> | <input type="checkbox"/>                            | <input type="checkbox"/> |
| 16. Compression bandaging                                    | <input type="checkbox"/>                                                   | <input type="checkbox"/> | <input type="checkbox"/> | <input type="checkbox"/> | <input type="checkbox"/>                            | <input type="checkbox"/> |

| Procedures                                           | How important do you think it is to learn this procedure during residency? |                          |                          |                          | Do you perform this procedure in your own practice? |                          |
|------------------------------------------------------|----------------------------------------------------------------------------|--------------------------|--------------------------|--------------------------|-----------------------------------------------------|--------------------------|
|                                                      | very important                                                             | important                | less important           | not important            | yes                                                 | no                       |
| <b>Eyes</b>                                          |                                                                            |                          |                          |                          |                                                     |                          |
| 17. Visual acuity testing                            | <input type="checkbox"/>                                                   | <input type="checkbox"/> | <input type="checkbox"/> | <input type="checkbox"/> | <input type="checkbox"/>                            | <input type="checkbox"/> |
| 18. Visual field confrontation testing               | <input type="checkbox"/>                                                   | <input type="checkbox"/> | <input type="checkbox"/> | <input type="checkbox"/> | <input type="checkbox"/>                            | <input type="checkbox"/> |
| 19. Perform eyelid eversion                          | <input type="checkbox"/>                                                   | <input type="checkbox"/> | <input type="checkbox"/> | <input type="checkbox"/> | <input type="checkbox"/>                            | <input type="checkbox"/> |
| 20. Application of fluorescein                       | <input type="checkbox"/>                                                   | <input type="checkbox"/> | <input type="checkbox"/> | <input type="checkbox"/> | <input type="checkbox"/>                            | <input type="checkbox"/> |
| 21. Ophthalmoscopy                                   | <input type="checkbox"/>                                                   | <input type="checkbox"/> | <input type="checkbox"/> | <input type="checkbox"/> | <input type="checkbox"/>                            | <input type="checkbox"/> |
| 22. Remove conjunctival foreign body                 | <input type="checkbox"/>                                                   | <input type="checkbox"/> | <input type="checkbox"/> | <input type="checkbox"/> | <input type="checkbox"/>                            | <input type="checkbox"/> |
| 23. Remove corneal foreign body                      | <input type="checkbox"/>                                                   | <input type="checkbox"/> | <input type="checkbox"/> | <input type="checkbox"/> | <input type="checkbox"/>                            | <input type="checkbox"/> |
| 24. Apply eye patch                                  | <input type="checkbox"/>                                                   | <input type="checkbox"/> | <input type="checkbox"/> | <input type="checkbox"/> | <input type="checkbox"/>                            | <input type="checkbox"/> |
| <b>Ears</b>                                          |                                                                            |                          |                          |                          |                                                     |                          |
| 25. Otoscopy                                         | <input type="checkbox"/>                                                   | <input type="checkbox"/> | <input type="checkbox"/> | <input type="checkbox"/> | <input type="checkbox"/>                            | <input type="checkbox"/> |
| 26. Remove cerumen impaction                         | <input type="checkbox"/>                                                   | <input type="checkbox"/> | <input type="checkbox"/> | <input type="checkbox"/> | <input type="checkbox"/>                            | <input type="checkbox"/> |
| 27. Audiometry                                       |                                                                            |                          |                          |                          |                                                     |                          |
| 28. Remove foreign body from external auditory canal | <input type="checkbox"/>                                                   | <input type="checkbox"/> | <input type="checkbox"/> | <input type="checkbox"/> | <input type="checkbox"/>                            | <input type="checkbox"/> |
| 29. Epley maneuver                                   | <input type="checkbox"/>                                                   | <input type="checkbox"/> | <input type="checkbox"/> | <input type="checkbox"/> | <input type="checkbox"/>                            | <input type="checkbox"/> |
| <b>Nose</b>                                          |                                                                            |                          |                          |                          |                                                     |                          |
| 30. Remove foreign body from nose                    | <input type="checkbox"/>                                                   | <input type="checkbox"/> | <input type="checkbox"/> | <input type="checkbox"/> | <input type="checkbox"/>                            | <input type="checkbox"/> |
| 31. Cautery of anterior epistaxis                    | <input type="checkbox"/>                                                   | <input type="checkbox"/> | <input type="checkbox"/> | <input type="checkbox"/> | <input type="checkbox"/>                            | <input type="checkbox"/> |
| 32. Nasal packing                                    | <input type="checkbox"/>                                                   | <input type="checkbox"/> | <input type="checkbox"/> | <input type="checkbox"/> | <input type="checkbox"/>                            | <input type="checkbox"/> |
| <b>Chest</b>                                         |                                                                            |                          |                          |                          |                                                     |                          |
| 33. Perform thoracocentesis                          | <input type="checkbox"/>                                                   | <input type="checkbox"/> | <input type="checkbox"/> | <input type="checkbox"/> | <input type="checkbox"/>                            | <input type="checkbox"/> |
| 34. Reduce tension pneumothorax                      | <input type="checkbox"/>                                                   | <input type="checkbox"/> | <input type="checkbox"/> | <input type="checkbox"/> | <input type="checkbox"/>                            | <input type="checkbox"/> |
| 35. Place thoracic drainage                          | <input type="checkbox"/>                                                   | <input type="checkbox"/> | <input type="checkbox"/> | <input type="checkbox"/> | <input type="checkbox"/>                            | <input type="checkbox"/> |

| Procedures                                          | How important do you think it is to learn this procedure during residency? |                          |                          |                          | Do you perform this procedure in your own practice? |                          |
|-----------------------------------------------------|----------------------------------------------------------------------------|--------------------------|--------------------------|--------------------------|-----------------------------------------------------|--------------------------|
|                                                     | very important                                                             | important                | less important           | not important            | yes                                                 | no                       |
| <b>Gastrointestinal Tract</b>                       |                                                                            |                          |                          |                          |                                                     |                          |
| 36. Insert nasogastric tube                         | <input type="checkbox"/>                                                   | <input type="checkbox"/> | <input type="checkbox"/> | <input type="checkbox"/> | <input type="checkbox"/>                            | <input type="checkbox"/> |
| 37. Perform gastric lavage                          | <input type="checkbox"/>                                                   | <input type="checkbox"/> | <input type="checkbox"/> | <input type="checkbox"/> | <input type="checkbox"/>                            | <input type="checkbox"/> |
| 38. Fecal occult blood testing                      | <input type="checkbox"/>                                                   | <input type="checkbox"/> | <input type="checkbox"/> | <input type="checkbox"/> | <input type="checkbox"/>                            | <input type="checkbox"/> |
| 39. Perform proctoscopy                             | <input type="checkbox"/>                                                   | <input type="checkbox"/> | <input type="checkbox"/> | <input type="checkbox"/> | <input type="checkbox"/>                            | <input type="checkbox"/> |
| 40. Incise and drain thrombosed external hemorrhoid | <input type="checkbox"/>                                                   | <input type="checkbox"/> | <input type="checkbox"/> | <input type="checkbox"/> | <input type="checkbox"/>                            | <input type="checkbox"/> |
| 41. Incise and drain perianal abscess               | <input type="checkbox"/>                                                   | <input type="checkbox"/> | <input type="checkbox"/> | <input type="checkbox"/> | <input type="checkbox"/>                            | <input type="checkbox"/> |
| 42. Paracentesis                                    | <input type="checkbox"/>                                                   | <input type="checkbox"/> | <input type="checkbox"/> | <input type="checkbox"/> | <input type="checkbox"/>                            | <input type="checkbox"/> |
| <b>Urogenital System</b>                            |                                                                            |                          |                          |                          |                                                     |                          |
| 43. Microscopic analysis of urine sediment          | <input type="checkbox"/>                                                   | <input type="checkbox"/> | <input type="checkbox"/> | <input type="checkbox"/> | <input type="checkbox"/>                            | <input type="checkbox"/> |
| 44. Place transurethral catheter                    | <input type="checkbox"/>                                                   | <input type="checkbox"/> | <input type="checkbox"/> | <input type="checkbox"/> | <input type="checkbox"/>                            | <input type="checkbox"/> |
| 45. Suprapubic catheterization                      | <input type="checkbox"/>                                                   | <input type="checkbox"/> | <input type="checkbox"/> | <input type="checkbox"/> | <input type="checkbox"/>                            | <input type="checkbox"/> |
| 46. Gynecological examination                       | <input type="checkbox"/>                                                   | <input type="checkbox"/> | <input type="checkbox"/> | <input type="checkbox"/> | <input type="checkbox"/>                            | <input type="checkbox"/> |
| 47. Collection of high vaginal swab                 | <input type="checkbox"/>                                                   | <input type="checkbox"/> | <input type="checkbox"/> | <input type="checkbox"/> | <input type="checkbox"/>                            | <input type="checkbox"/> |
| 48. Pap smear                                       | <input type="checkbox"/>                                                   | <input type="checkbox"/> | <input type="checkbox"/> | <input type="checkbox"/> | <input type="checkbox"/>                            | <input type="checkbox"/> |
| 49. Placing intrauterine device                     | <input type="checkbox"/>                                                   | <input type="checkbox"/> | <input type="checkbox"/> | <input type="checkbox"/> | <input type="checkbox"/>                            | <input type="checkbox"/> |
| <b>Obstetrics and Pediatrics</b>                    |                                                                            |                          |                          |                          |                                                     |                          |
| 50. Perform vaginal delivery                        | <input type="checkbox"/>                                                   | <input type="checkbox"/> | <input type="checkbox"/> | <input type="checkbox"/> | <input type="checkbox"/>                            | <input type="checkbox"/> |
| 51. Perform episiotomy and repair                   | <input type="checkbox"/>                                                   | <input type="checkbox"/> | <input type="checkbox"/> | <input type="checkbox"/> | <input type="checkbox"/>                            | <input type="checkbox"/> |
| 52. Perform well-child care visits                  | <input type="checkbox"/>                                                   | <input type="checkbox"/> | <input type="checkbox"/> | <input type="checkbox"/> | <input type="checkbox"/>                            | <input type="checkbox"/> |
| 53. Perform early adolescent visit                  | <input type="checkbox"/>                                                   | <input type="checkbox"/> | <input type="checkbox"/> | <input type="checkbox"/> | <input type="checkbox"/>                            | <input type="checkbox"/> |

| Procedures                                                  | How important do you think it is to learn this procedure during residency? |                          |                          |                          | Do you perform this procedure in your own practice? |                          |
|-------------------------------------------------------------|----------------------------------------------------------------------------|--------------------------|--------------------------|--------------------------|-----------------------------------------------------|--------------------------|
|                                                             | very important                                                             | important                | less important           | not important            | yes                                                 | no                       |
| <b>Musculoskeletal System</b>                               |                                                                            |                          |                          |                          |                                                     |                          |
| 54. Splint injured extremities                              | <input type="checkbox"/>                                                   | <input type="checkbox"/> | <input type="checkbox"/> | <input type="checkbox"/> | <input type="checkbox"/>                            | <input type="checkbox"/> |
| 55. Reduce dislocated finger                                | <input type="checkbox"/>                                                   | <input type="checkbox"/> | <input type="checkbox"/> | <input type="checkbox"/> | <input type="checkbox"/>                            | <input type="checkbox"/> |
| 56. Reduce dislocated radial head                           | <input type="checkbox"/>                                                   | <input type="checkbox"/> | <input type="checkbox"/> | <input type="checkbox"/> | <input type="checkbox"/>                            | <input type="checkbox"/> |
| 57. Reduce dislocated shoulder                              | <input type="checkbox"/>                                                   | <input type="checkbox"/> | <input type="checkbox"/> | <input type="checkbox"/> | <input type="checkbox"/>                            | <input type="checkbox"/> |
| 58. Apply below-elbow backslab                              | <input type="checkbox"/>                                                   | <input type="checkbox"/> | <input type="checkbox"/> | <input type="checkbox"/> | <input type="checkbox"/>                            | <input type="checkbox"/> |
| 59. Apply cast for scaphoid fracture                        | <input type="checkbox"/>                                                   | <input type="checkbox"/> | <input type="checkbox"/> | <input type="checkbox"/> | <input type="checkbox"/>                            | <input type="checkbox"/> |
| 60. Apply below-knee backslab                               | <input type="checkbox"/>                                                   | <input type="checkbox"/> | <input type="checkbox"/> | <input type="checkbox"/> | <input type="checkbox"/>                            | <input type="checkbox"/> |
| 61. Aspirate and inject bursae (e.g. patellar, subacromial) | <input type="checkbox"/>                                                   | <input type="checkbox"/> | <input type="checkbox"/> | <input type="checkbox"/> | <input type="checkbox"/>                            | <input type="checkbox"/> |
| 62. Perform chiropractic / manual medicine                  | <input type="checkbox"/>                                                   | <input type="checkbox"/> | <input type="checkbox"/> | <input type="checkbox"/> | <input type="checkbox"/>                            | <input type="checkbox"/> |
| <b>Resuscitation</b>                                        |                                                                            |                          |                          |                          |                                                     |                          |
| 63. Insert oral airway                                      | <input type="checkbox"/>                                                   | <input type="checkbox"/> | <input type="checkbox"/> | <input type="checkbox"/> | <input type="checkbox"/>                            | <input type="checkbox"/> |
| 64. Perform mask ventilation                                | <input type="checkbox"/>                                                   | <input type="checkbox"/> | <input type="checkbox"/> | <input type="checkbox"/> | <input type="checkbox"/>                            | <input type="checkbox"/> |
| 65. Perform endotracheal intubation                         | <input type="checkbox"/>                                                   | <input type="checkbox"/> | <input type="checkbox"/> | <input type="checkbox"/> | <input type="checkbox"/>                            | <input type="checkbox"/> |
| 66. Perform cardiac defibrillation                          | <input type="checkbox"/>                                                   | <input type="checkbox"/> | <input type="checkbox"/> | <input type="checkbox"/> | <input type="checkbox"/>                            | <input type="checkbox"/> |
| 67. Cardioversion                                           | <input type="checkbox"/>                                                   | <input type="checkbox"/> | <input type="checkbox"/> | <input type="checkbox"/> | <input type="checkbox"/>                            | <input type="checkbox"/> |
| <b>Punctures</b>                                            |                                                                            |                          |                          |                          |                                                     |                          |
| 68. Infiltrate local anaesthetic                            | <input type="checkbox"/>                                                   | <input type="checkbox"/> | <input type="checkbox"/> | <input type="checkbox"/> | <input type="checkbox"/>                            | <input type="checkbox"/> |
| 69. Digital nerve block                                     | <input type="checkbox"/>                                                   | <input type="checkbox"/> | <input type="checkbox"/> | <input type="checkbox"/> | <input type="checkbox"/>                            | <input type="checkbox"/> |
| 70. Aspirate and inject knee joint                          | <input type="checkbox"/>                                                   | <input type="checkbox"/> | <input type="checkbox"/> | <input type="checkbox"/> | <input type="checkbox"/>                            | <input type="checkbox"/> |
| 71. Aspirate and inject shoulder joint                      | <input type="checkbox"/>                                                   | <input type="checkbox"/> | <input type="checkbox"/> | <input type="checkbox"/> | <input type="checkbox"/>                            | <input type="checkbox"/> |

| Procedures                                               | How important do you think it is to learn this procedure during residency? |                          |                          |                          | Do you perform this procedure in your own practice? |                          |
|----------------------------------------------------------|----------------------------------------------------------------------------|--------------------------|--------------------------|--------------------------|-----------------------------------------------------|--------------------------|
|                                                          | very important                                                             | important                | less important           | not important            | yes                                                 | no                       |
| 72. Insert intravenous line in adult                     | <input type="checkbox"/>                                                   | <input type="checkbox"/> | <input type="checkbox"/> | <input type="checkbox"/> | <input type="checkbox"/>                            | <input type="checkbox"/> |
| 73. Insert intravenous line in child                     | <input type="checkbox"/>                                                   | <input type="checkbox"/> | <input type="checkbox"/> | <input type="checkbox"/> | <input type="checkbox"/>                            | <input type="checkbox"/> |
| 74. Insert intravenous line in infant                    | <input type="checkbox"/>                                                   | <input type="checkbox"/> | <input type="checkbox"/> | <input type="checkbox"/> | <input type="checkbox"/>                            | <input type="checkbox"/> |
| 75. Perform lumbar puncture in adult                     | <input type="checkbox"/>                                                   | <input type="checkbox"/> | <input type="checkbox"/> | <input type="checkbox"/> | <input type="checkbox"/>                            | <input type="checkbox"/> |
| 76. Perform lumbar puncture in child                     | <input type="checkbox"/>                                                   | <input type="checkbox"/> | <input type="checkbox"/> | <input type="checkbox"/> | <input type="checkbox"/>                            | <input type="checkbox"/> |
| 77. Infusion therapy                                     | <input type="checkbox"/>                                                   | <input type="checkbox"/> | <input type="checkbox"/> | <input type="checkbox"/> | <input type="checkbox"/>                            | <input type="checkbox"/> |
| 78. Access implantable venous access port                | <input type="checkbox"/>                                                   | <input type="checkbox"/> | <input type="checkbox"/> | <input type="checkbox"/> | <input type="checkbox"/>                            | <input type="checkbox"/> |
| 79. Flush implantable venous access port                 | <input type="checkbox"/>                                                   | <input type="checkbox"/> | <input type="checkbox"/> | <input type="checkbox"/> | <input type="checkbox"/>                            | <input type="checkbox"/> |
| 80. Acupuncture                                          | <input type="checkbox"/>                                                   | <input type="checkbox"/> | <input type="checkbox"/> | <input type="checkbox"/> | <input type="checkbox"/>                            | <input type="checkbox"/> |
| 81. Neural therapy                                       | <input type="checkbox"/>                                                   | <input type="checkbox"/> | <input type="checkbox"/> | <input type="checkbox"/> | <input type="checkbox"/>                            | <input type="checkbox"/> |
| <b>Technical Diagnostics</b>                             |                                                                            |                          |                          |                          |                                                     |                          |
| 82. Set up and record 12 lead electrocardiogram          | <input type="checkbox"/>                                                   | <input type="checkbox"/> | <input type="checkbox"/> | <input type="checkbox"/> | <input type="checkbox"/>                            | <input type="checkbox"/> |
| 83. Perform exercise stress test                         | <input type="checkbox"/>                                                   | <input type="checkbox"/> | <input type="checkbox"/> | <input type="checkbox"/> | <input type="checkbox"/>                            | <input type="checkbox"/> |
| 84. Perform 24-hour ambulatory blood pressure monitoring | <input type="checkbox"/>                                                   | <input type="checkbox"/> | <input type="checkbox"/> | <input type="checkbox"/> | <input type="checkbox"/>                            | <input type="checkbox"/> |
| 85. Perform spirometry                                   | <input type="checkbox"/>                                                   | <input type="checkbox"/> | <input type="checkbox"/> | <input type="checkbox"/> | <input type="checkbox"/>                            | <input type="checkbox"/> |
| 86. Abdominal ultrasound                                 | <input type="checkbox"/>                                                   | <input type="checkbox"/> | <input type="checkbox"/> | <input type="checkbox"/> | <input type="checkbox"/>                            | <input type="checkbox"/> |
| 87. Thyroid ultrasound                                   | <input type="checkbox"/>                                                   | <input type="checkbox"/> | <input type="checkbox"/> | <input type="checkbox"/> | <input type="checkbox"/>                            | <input type="checkbox"/> |
| 88. Compression ultrasound of lower extremities          | <input type="checkbox"/>                                                   | <input type="checkbox"/> | <input type="checkbox"/> | <input type="checkbox"/> | <input type="checkbox"/>                            | <input type="checkbox"/> |
| 89. Doppler ultrasound of extracranial brain arteries    | <input type="checkbox"/>                                                   | <input type="checkbox"/> | <input type="checkbox"/> | <input type="checkbox"/> | <input type="checkbox"/>                            | <input type="checkbox"/> |
| 90. Nebulisation therapy                                 | <input type="checkbox"/>                                                   | <input type="checkbox"/> | <input type="checkbox"/> | <input type="checkbox"/> | <input type="checkbox"/>                            | <input type="checkbox"/> |

## Sociodemographic Data

|                                                                                                                                                      |                                                                |
|------------------------------------------------------------------------------------------------------------------------------------------------------|----------------------------------------------------------------|
| 91. What year were you born? Please enter the date.                                                                                                  |                                                                |
| 19 <input type="text"/> <input type="text"/>                                                                                                         |                                                                |
| 92. Your sex?                                                                                                                                        | <input type="checkbox"/> female <input type="checkbox"/> male  |
| 93. For how many years have you been practicing in primary care (after board certification)?                                                         | <input type="text"/> <input type="text"/> Jahre                |
| 94. If you were board certified before 1990: Where did you complete your residency?                                                                  |                                                                |
| <input type="checkbox"/> Newly-formed German states <input type="checkbox"/> Former West German states <input type="checkbox"/> Residency after 1990 |                                                                |
| 95. Where is your (main) practice location?                                                                                                          |                                                                |
| <input type="checkbox"/> Rural area <input type="checkbox"/> Urban area                                                                              |                                                                |
| 96. How many inhabitants does your practice location have?                                                                                           |                                                                |
| <input type="checkbox"/> < 5,000 inhabitants                                                                                                         | <input type="checkbox"/> 5,000 - 10,000 inhabitants            |
| <input type="checkbox"/> > 10,000 - 20,000 inhabitants                                                                                               | <input type="checkbox"/> > 20,000 - 50,000 inhabitants         |
| <input type="checkbox"/> > 50,000 - 100,000 inhabitants                                                                                              | <input type="checkbox"/> > 100,000 inhabitants                 |
| 97. Which specialty do you belong to?                                                                                                                |                                                                |
| <input type="checkbox"/> General Practitioner                                                                                                        | <input type="checkbox"/> Specialist in Family Medicine         |
| <input type="checkbox"/> Specialist in Internal Medicine                                                                                             | <input type="checkbox"/> Other: _____                          |
| 98. What is your practice model?                                                                                                                     |                                                                |
| <input type="checkbox"/> Solo practice                                                                                                               | <input type="checkbox"/> Practice with more than one physician |
| <input type="checkbox"/> Other: _____                                                                                                                |                                                                |
| 99. What is the average number of patients per quarter in your practice? Please count patients with statutory <b>and</b> private health insurance.   |                                                                |
| <input type="checkbox"/> < 500 patients                                                                                                              | <input type="checkbox"/> > 500 - 1,000 patients                |
| <input type="checkbox"/> > 1,000 - 1,500 patients                                                                                                    | <input type="checkbox"/> > 1,500 - 2,000 patients              |
| <input type="checkbox"/> > 2,000 - 2,500 patients                                                                                                    | <input type="checkbox"/> > 2,500 patients                      |

100. If you think procedures are missing in this questionnaire, please add them here:

**Thank you very much for your participation!**
